# Supplementary material for: Magnificent magpie colours by feathers with layers of hollow melanosomes
Source: Oxford University Press journal article supplement (doi:10.1242/jeb.174656), 2017-01-01
Supplement: jeb174656supp.pdf [file jeb174656supp.pdf]

## Supplementary Material

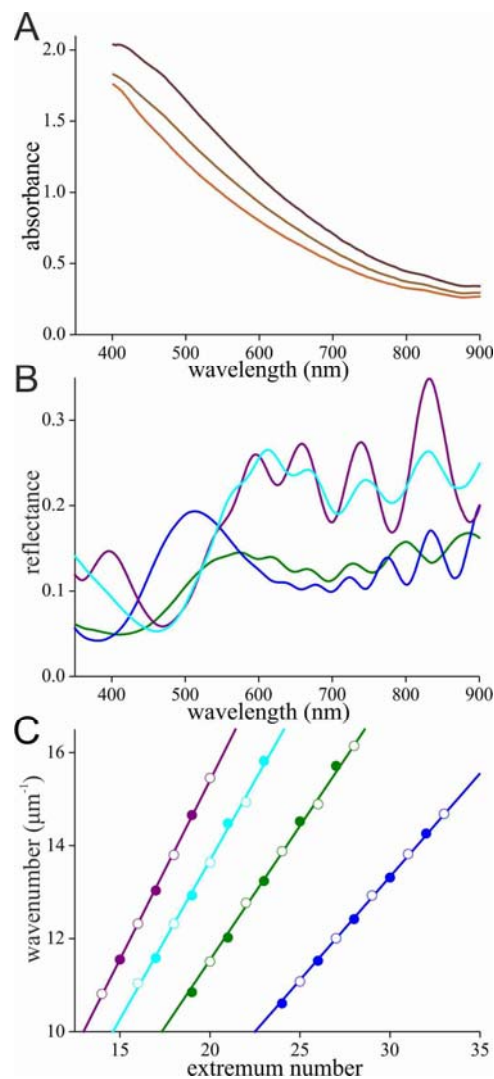

Fig. S1. Optical characteristics of single barbule cells. (A) Absorbance spectra of three different barbules immersed in immersion oil measured with a microspectrophotometer (MSP; area cross section  $\sim 10 \mu\text{m}$ ). (B) MSP reflectance spectra of four different barbules in air, showing oscillations. (C) Wave numbers calculated with the wavelength values of the oscillation minima (open circles) and maxima (closed circles)  $> 600 \text{ nm}$  of the four spectra of panel A. The fitted linear functions yielded the local barbule thickness:  $2.0 \mu\text{m}$  (purple data),  $2.3 \mu\text{m}$  (cyan),  $2.7 \mu\text{m}$  (green), and  $3.5 \mu\text{m}$  (blue).

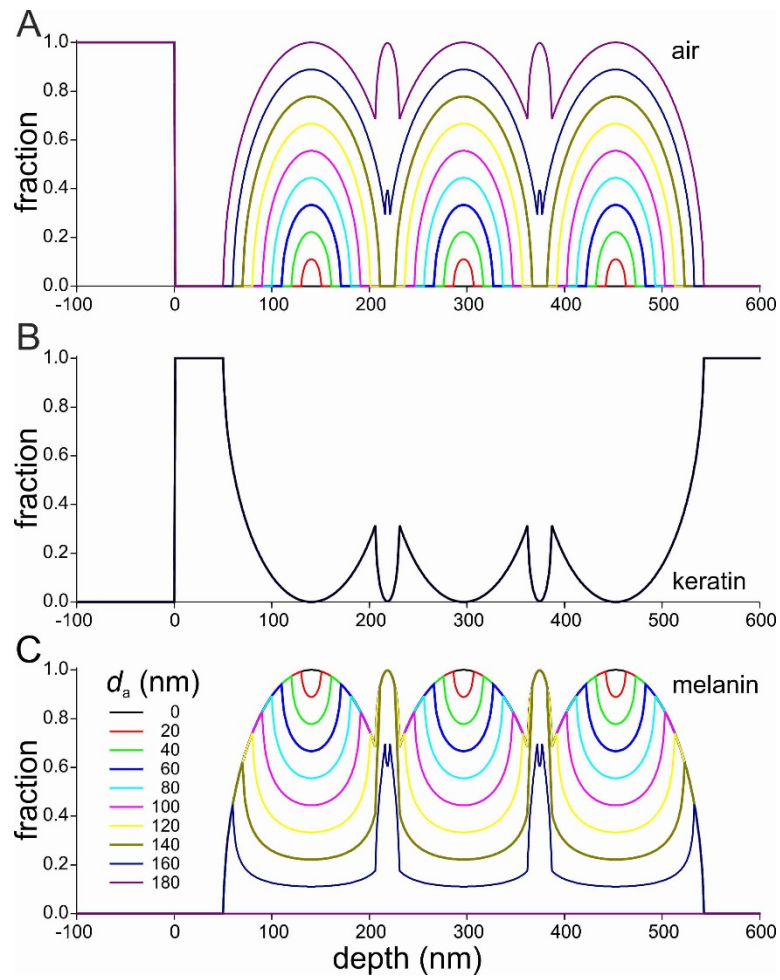

Fig. S2. The fractions of air (A), keratin (B), and melanin (C) as a function of depth for three layers of close-packed melanosomes with diameter  $d_m = 180$  nm and variously sized air holes with diameter  $d_a$ .

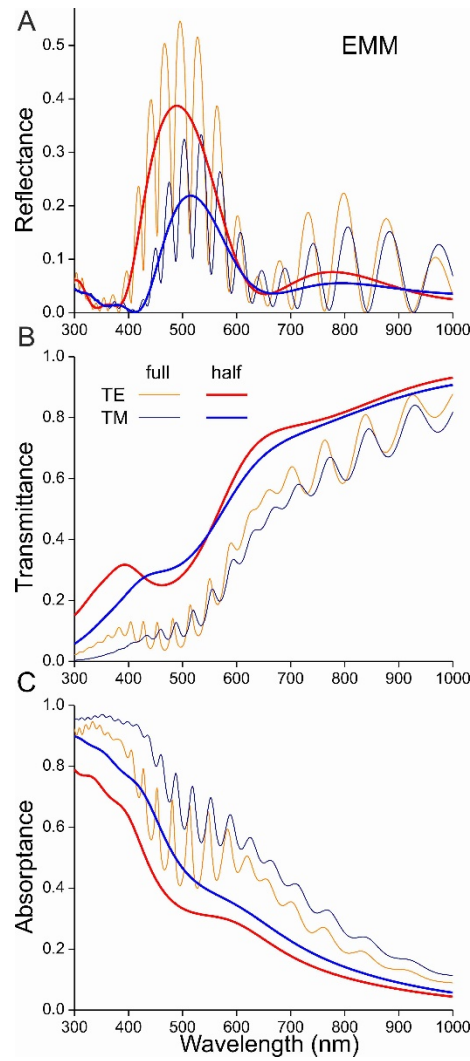

Fig. S3. Reflectance (A), transmittance (B), and absorbance (C) spectra of the full barbule of Fig. 4 as well only half the barbule, for normally incident TE- and TM-polarised light, calculated with the transfer-matrix formalism for effective medium multilayers (EMM), using the refractive index profiles of Fig. 4 for  $w = -2$  and  $2$ , respectively.

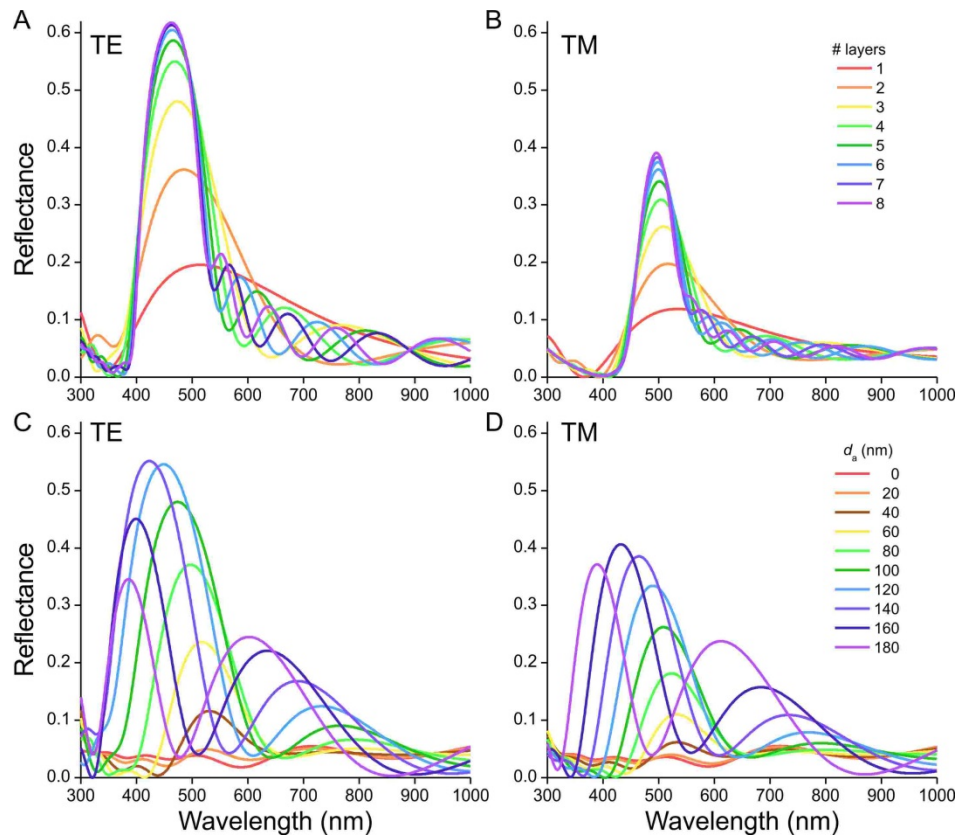

Fig. S4. Dependence of the reflectance of a half barbule on the number of melanosome layers and air core diameter calculated with the transfer-matrix formalism for multilayers. (A, B) Reflectance spectra for 1 to 8 layers of melanosomes with diameter  $d_m = 180$  nm and air hole diameter  $d_a = 100$  nm, using the refractive index profiles of Fig. 4 for  $w = -2$  and  $2$  for TE- and TM-polarised light, respectively. (C, D) Reflectance spectra for TE- and TM-polarised light for three layers of melanosomes with diameter  $d_m = 180$  nm and air hole diameters of 0 to 180 nm.

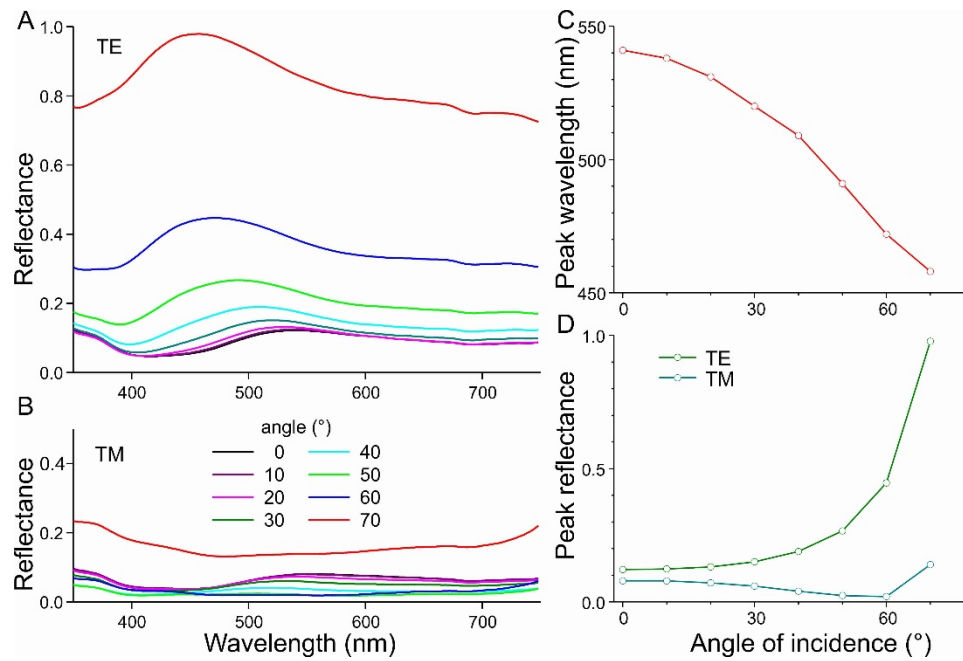

Fig. S5. Angle dependence of the reflectance of TE- and TM-polarised light for the green area of the magpie feather in Fig. 1C. (A) Reflectance spectra of TE-polarised light for angles of light incidence  $0^{\circ}$  to  $70^{\circ}$ . (B) Reflectance spectra of TM-polarised light. (C) Peak wavelength of the reflectance spectra of (A) as a function of the angle of light incidence. (D) Reflectance values at the peak wavelengths in (C) for TE- and TM-polarised light.
